# Supplementary material
Source: HighWire-hosted journal article supplement (https://jech.bmj.com/content/jech-2022-219851)
Supplement: inline-supplementary-material-1 [file inline-supplementary-material-1.pdf]

## Supplementary Material

Supplementary Table 1. ICD (10, 9, 8) codes included in each disease group.

| Disease group                                       | ICD 10 (1997-2020)                                                                                                                                                                               | ICD 9 (1987-1996)                                                                                                             | ICD 8 (1973-1986)                                                                                                         |
|-----------------------------------------------------|--------------------------------------------------------------------------------------------------------------------------------------------------------------------------------------------------|-------------------------------------------------------------------------------------------------------------------------------|---------------------------------------------------------------------------------------------------------------------------|
| External causes (excl. alcohol related)             | E000-E999, V01-Y89 (excl. X41-X42, X44, X45)                                                                                                                                                     | E000-E999                                                                                                                     | E000-E999                                                                                                                 |
| Self-harm <sup>1,2,3,4</sup>                        | X60-X84, Y870, Y10-Y34                                                                                                                                                                           | E950-E959, E980-E989                                                                                                          | E950-E959, E980-E989                                                                                                      |
| NCDs (non-communicable diseases)                    | C00-C97, D00-D48, D55-D64 (excl. D 64.9), D65-D89, E03-E34, E65-E88, F01-F99, G06-G98 (excl. G14), H00-H61, H68-H93, I00-I99, J30-J98, K00-K92, L00-L98, M00-M99, N00-N64, N75-N98, Q00-Q99, R95 | 140-242, 244-259, 270-279 (excl. 279.5), 282-285 (excl. 285.9), 290-319, 324-380, 383-459, 470-478, 490-611, 617-629, 680-759 | 140-209, 230-239, 244-258, 270-279, 282-285, 290-315, 321, 322, 324, 330-380, 383-459, 460-519, 520-611, 623-629, 680-759 |
| Mental and behavioural disorders                    | F04-F99, G72.1, Q86.0, X41-X42, X44, X45                                                                                                                                                         | 2900-319, 324-359, 7598, 7800, E851-E852, E860                                                                                | 290-315                                                                                                                   |
| Anxiety <sup>5</sup>                                | F40-F44                                                                                                                                                                                          | 300.A, 300.B, 300.C, 300.D, 308.A, 308.B, 308.D, 308.E, 308.X, 309.W                                                          | 299, 300.0, 300.1, 300.2, 300.3, 306.9, 301.8, 307, 308, 781.5                                                            |
| Depression <sup>5</sup>                             | F32-F33, F34.1                                                                                                                                                                                   | 296.B, 296.G, 296.X, 298.A, 304.E, 311                                                                                        | 296.0, 296.1, 296.2, 296.8, 296.9, 298.0, 300.0, 300.4, 304.4, 790.2                                                      |
| Substance use disorders <sup>6</sup>                | E24.4, F10-F16, F18-F19, I42.6, G31.2, G72.1, Q86.0, R78.0, T40, T42.3-T42.6, T43.6, X41-X42, X44d, X45, Y15, Z50.2, Z50.3 Z71.4, Z71.5 Z72.1, Z72.2                                             | 255, 291,292, 303, 304, 305, 357.F, 425.F, 571, 790.3, 965.A, 968.E, 969G-H, 975.C, 980, V578, V654, V658, Y39, Y79, E860     | 2580, 2589, 291, 2943, 303, 304, 57100, 962.0, 966.x, 967.0, 967.9, 969, 976.9, 970, 971, 980, E860                       |
| CVDs (cardiovascular diseases)                      | I00-I99                                                                                                                                                                                          | 390-459                                                                                                                       | 390-459                                                                                                                   |
| Cancers (malignant neoplasms)                       | C00-C97                                                                                                                                                                                          | 140-208, 230-239                                                                                                              | 140-209, 230-239                                                                                                          |
| Respiratory diseases (chronic respiratory diseases) | J30-J98                                                                                                                                                                                          | 470-4789, 490-496, 500-509, 5110-5198, 6800-6820, 7309-7339                                                                   | 460-519                                                                                                                   |
| Diabetes                                            | E10-E14 (excl. E10.2, E11.2, E12.2, E13.2, E14.2)                                                                                                                                                | 2500-2510 (excl. 2503)                                                                                                        | 249-250                                                                                                                   |

The categorisation above mostly follows the general categorisation used in the Global Burden of Disease studies:  
[http://www.healthdata.org/sites/default/files/files/data\\_for\\_download/2012/IHME\\_GBD2010\\_CauseListandICD.pdf](http://www.healthdata.org/sites/default/files/files/data_for_download/2012/IHME_GBD2010_CauseListandICD.pdf)

## References

1. Vinnerljung B, Hjerm A, Lindblad F. Suicide attempts and severe psychiatric morbidity among former child welfare clients—a national cohort study. *Journal of child psychology and psychiatry*. 2006;47(7):723-733.
2. Björkenstam C, Björkenstam E, Ljung R, Vinnerljung B, Tuvblad C. Suicidal behavior among delinquent former child welfare clients. *European child & adolescent psychiatry*. 2013;22(6):349-355.
3. Björkenstam C, Kosidou K, Björkenstam E. Childhood adversity and risk of suicide: cohort study of 548 721 adolescents and young adults in Sweden. *BMJ*. 2017;357:j1334.
4. Björkenstam C. Epidemiological studies of suicide: classification bias, drug use, and social circumstances. *Inst för folkhälsovetenskap/Dept of Public Health Sciences*; 2013.
5. Modin B, Östberg V, Almquist Y. Childhood peer status and adult susceptibility to anxiety and depression. A 30-year follow-up of Stockholm girls. *Journal of Abnormal Child Psychology*. 2011;39(2):187-99.
6. Following the outcome operationalisation used in the same sample by Bishop & Almquist, 2021; Friends' childhood adversity and long-term implications for substance misuse: a prospective Swedish cohort study. *Addiction*;116: 632-640.

**Supplementary Table 2.** Model fit statistics for the count variable of hospitalisations due to major cause groups, covariate-adjusted poisson, zero-inflated poisson, and negative binomial models

|                                  | BIC        |                       |                   | AIC        |                       |                   |
|----------------------------------|------------|-----------------------|-------------------|------------|-----------------------|-------------------|
|                                  | Poisson    | Zero-inflated poisson | Negative binomial | Poisson    | Zero-inflated poisson | Negative binomial |
| External                         | 36929.527  | 32441.323             | 29834.324         | 36853.964  | 32290.197             | 29751.205         |
| Self-harm                        | 8210.633   | 5987.518              | 5697.830          | 8135.070   | 5836.391              | 5614.710          |
| NCDs                             | 140225.876 | 120826.591            | 67992.480         | 140203.207 | 120781.253            | 67962.255         |
| Mental and behavioural disorders | 86777.671  | 43985.199             | 22243.975         | 86702.107  | 43834.072             | 22160.856         |
| Anxiety                          | 12217.546  | 7399.523              | 6117.783          | 12141.982  | 7248.396              | 6034.663          |
| Depression                       | 12454.032  | 7732.637              | 6956.307          | 12378.469  | 7581.510              | 6873.188          |
| Substance misuse                 | 57373.546  | 27069.904             | 14173.146         | 57297.983  | 14090.026             | 26918.778         |
| CVDs                             | 43523.547  | 33640.796             | 28874.652         | 43447.984  | 33489.669             | 28791.533         |
| Cancer                           | 36145.042  | 22295.978             | 18926.588         | 36069.478  | 22144.851             | 18843.468         |
| Respiratory                      | 19894.914  | 15988.411             | 14231.532         | 19819.351  | 15837.284             | 14148.412         |
| Diabetes                         | 18113.459  | 9895.384              | 7543.627          | 18037.895  | 9744.258              | 7460.507          |

Note: All models are adjusted for born out of wedlock, mother's age at birth, occupational status of the father at birth, and family education at age 10.

## Additional background on hospitalisations

Of the over 78,000 hospitalisations, 75% were due to NCDs, and 12% were due to external causes. The most prevalent primary and secondary causes of hospitalisations (except pregnancy) were external causes, diseases of the digestive system, diseases of the genitourinary system, cancers, musculoskeletal diseases, CVDs, respiratory diseases, and mental and behavioural disorders. The most important causes of deaths between ages 20-66 were cancers (35%), CVDs (19%), external causes (18%), diseases of the digestive system (6%), mental and behavioural disorders (4%), and disease of the respiratory system (4%).

**Supplementary Table 3.** Hospitalisations in ages 20-66: Median number of hospitalisations (frequency) and the median age at first hospitalisation (onset), among those with at least one hospitalisation within each disease group, stratified by sex and ICWS group.

|                                            | Hospitalisations among males in ages 20-66<br>(n=7,204) |       |              |       |           |       | Hospitalisations among females in ages 20-66<br>(n=6,930) |       |              |       |           |       |
|--------------------------------------------|---------------------------------------------------------|-------|--------------|-------|-----------|-------|-----------------------------------------------------------|-------|--------------|-------|-----------|-------|
|                                            | Without ICWS                                            |       | Investigated |       | Placed    |       | Without ICWS                                              |       | Investigated |       | Placed    |       |
|                                            | Frequency                                               | Onset | Frequency    | Onset | Frequency | Onset | Frequency                                                 | Onset | Frequency    | Onset | Frequency | Onset |
| External causes (n=2,472)                  | 1                                                       | 41.5  | 2            | 36.7  | 2         | 33.0  | 1                                                         | 48.2  | 1            | 45.4  | 2         | 42.8  |
| Self-harm (n=250)                          | 1                                                       | 35.9  | 1            | 35.3  | 1         | 30.2  | 1                                                         | 37.1  | 1            | 35.0  | 1         | 38.4  |
| NCDs (n=5,042)                             | 3                                                       | 41.6  | 3            | 40.1  | 5         | 32.3  | 3                                                         | 36.6  | 3            | 30.7  | 4         | 30.6  |
| Mental and behavioural disorders (n=1,146) | 2                                                       | 41.2  | 3            | 40.1  | 5         | 32.0  | 2                                                         | 40.0  | 3            | 31.0  | 4         | 32.3  |
| Anxiety (n=251)                            | 1                                                       | 45.4  | 1            | 45.8  | 2         | 30.1  | 1                                                         | 46.7  | 2            | 48.3  | 1         | 29.3  |
| Depression (n=283)                         | 1                                                       | 42.7  | 1            | 44.3  | 2         | 35.5  | 1                                                         | 47.1  | 1            | 33.4  | 2         | 43.7  |
| Substance use disorders (n=757)            | 2                                                       | 46.6  | 3            | 39.2  | 5         | 31.6  | 2                                                         | 47.0  | 2            | 46.5  | 4         | 45.5  |
| CVDs (n=2,207)                             | 2                                                       | 57.6  | 2            | 56.8  | 2         | 56.9  | 1                                                         | 56.9  | 1            | 56.8  | 1         | 56.1  |
| Cancers (n=850)                            | 2                                                       | 60.2  | 2            | 59.8  | 2         | 61.2  | 2                                                         | 54.2  | 2            | 56.7  | 3         | 52.0  |
| Respiratory diseases (n=821)               | 1                                                       | 33.4  | 1            | 41.0  | 1         | 34.9  | 1                                                         | 34.2  | 1            | 33.7  | 1         | 39.6  |
| Diabetes (n=381)                           | 2                                                       | 58.0  | 2            | 57.0  | 2         | 55.3  | 2                                                         | 55.1  | 2            | 57.2  | 3         | 55.4  |

**Supplementary Table 4.** The association between ICWS and disease-group-specific hospitalisations, stratified by sex. Results from negative binomial regression.

|                                  | Males<br>(N=7204) |           |             |            | Female<br>(N=6930) |            |              |            |
|----------------------------------|-------------------|-----------|-------------|------------|--------------------|------------|--------------|------------|
|                                  | Investigated      |           | Placed      |            | Investigated       |            | Placed       |            |
|                                  | IRR               | 95% CI    | IRR         | 95% CI     | IRR                | 95% CI     | IRR          | 95% CI     |
| External                         | <b>1.69</b>       | 1.51,1.90 | <b>2.21</b> | 1.91,2.55  | <b>1.40</b>        | 1.14,1.73  | <b>1.94</b>  | 1.62,2.32  |
| Self-harm                        | <b>2.62</b>       | 1.77,3.86 | <b>4.73</b> | 2.95,7.57  | <b>2.06</b>        | 1.12,3.78  | <b>4.11</b>  | 2.45,6.89  |
| NCDs                             | <b>1.66</b>       | 1.51,1.82 | <b>2.69</b> | 2.40,3.03  | <b>1.43</b>        | 1.25,1.64  | <b>2.20</b>  | 1.95,2.47  |
| Mental and behavioural disorders | <b>2.71</b>       | 2.07,3.54 | <b>6.73</b> | 4.83,9.38  | <b>2.38</b>        | 1.50,3.78  | <b>5.12</b>  | 3.41,7.70  |
| Anxiety                          | <b>2.42</b>       | 1.54,3.82 | <b>5.18</b> | 3.00,8.95  | 1.51               | 0.74,3.08  | <b>3.77</b>  | 2.05,6.93  |
| Depression                       | 1.79              | 1.15,2.81 | <b>5.16</b> | 3.09,8.62  | 1.04               | 0.55,1.98  | <b>4.16</b>  | 2.45,7.07  |
| Substance misuse                 | <b>3.96</b>       | 2.86,5.48 | <b>9.94</b> | 6.66,14.82 | <b>5.44</b>        | 2.92,10.14 | <b>10.72</b> | 6.18,18.61 |
| CVDs                             | <b>1.49</b>       | 1.29,1.72 | 1.30        | 1.08,1.56  | <b>1.56</b>        | 1.21,2.02  | 1.35         | 1.08,1.70  |
| Cancer                           | 1.16              | 0.72,1.52 | 1.35        | 0.96,1.89  | 1.23               | 0.86,1.77  | 1.36         | 0.99,1.87  |
| Respiratory                      | <b>1.46</b>       | 1.17,1.84 | <b>2.34</b> | 1.77,3.09  | 1.25               | 0.88,1.77  | <b>2.31</b>  | 1.73,3.09  |
| Diabetes                         | <b>2.00</b>       | 1.37,2.93 | 1.63        | 0.99,2.66  | 1.96               | 0.84,4.55  | <b>3.04</b>  | 1.46,6.33  |

Notes: NCDs=Non-communicable diseases; CVDs=Cardiovascular diseases; IRR=Incidence rate ratio; CI=Confidence interval. Reference group is 'Without ICWS'. (IRR=1.00). All models are adjusted for born out of wedlock, mother's age at birth, occupational status of the father at birth, and family education at age 10. Bold numbers signify a p-value  $\leq 0.004$ .

**Supplementary Table 5. Prevalence of comorbidity between mental and behavioural disorders, and a count of cardiovascular diseases, cancers, respiratory diseases, diabetes, and external causes (n=14,134).**

| Count of cardiovascular diseases, cancers, respiratory diseases, diabetes, and external causes | Among those hospitalised due to mental and behavioural disorders |          |                                                                 |              |          |                                                                 |        |          |                                                                 |
|------------------------------------------------------------------------------------------------|------------------------------------------------------------------|----------|-----------------------------------------------------------------|--------------|----------|-----------------------------------------------------------------|--------|----------|-----------------------------------------------------------------|
|                                                                                                | Without ICWS                                                     |          |                                                                 | Investigated |          |                                                                 | Placed |          |                                                                 |
|                                                                                                | n                                                                | Column % | Prevalence of mental and behavioural disorder in this group (%) | n            | Column % | Prevalence of mental and behavioural disorder in this group (%) | n      | Column % | Prevalence of mental and behavioural disorder in this group (%) |
| 0                                                                                              | 289                                                              | 24.1     | 5.5                                                             | 52           | 13.6     | 9.3                                                             | 74     | 17.0     | 17.5                                                            |
| 1                                                                                              | 423                                                              | 35.3     | 11.8                                                            | 138          | 36.1     | 24.0                                                            | 157    | 36.1     | 35.1                                                            |
| 2                                                                                              | 310                                                              | 25.9     | 18.0                                                            | 119          | 31.2     | 33.2                                                            | 125    | 28.7     | 46.6                                                            |
| 3 or more                                                                                      | 175                                                              | 14.6     | 26.4                                                            | 73           | 19.1     | 46.5                                                            | 79     | 18.2     | 53.4                                                            |
